# Supplementary material for: Pd/CuO–Ni(OH)2/C as a highly efficient and stable catalyst for the electrocatalytic oxidation of ethanol
Source: Royal Society of Chemistry journal article supplement (doi:10.1039/d1gc04799j), 2022-01-01
Supplement: d1gc04799j1.pdf [file d1gc04799j1.pdf]

## Supporting Information

### **Pd/CuO-Ni(OH)<sub>2</sub>/C as highly efficient and stable catalyst for electrocatalytic oxidation of ethanol**

Sifan Zhang<sup>a,1</sup>, An Pei<sup>a,1</sup>, Guang Li<sup>b,1</sup>, Lihua Zhu<sup>a,\*</sup>, Guoda Li<sup>a</sup>, Fengshun Wu<sup>a</sup>, Shuting Lin<sup>a</sup>, Wenqi Chen<sup>a</sup>, Bing Hui Chen<sup>b</sup>, Rafael Luque<sup>c,d,\*</sup>

<sup>a</sup> College of Chemistry and Chemical Engineering, Jiangxi University of Science and Technology, China

<sup>b</sup> National Engineering Laboratory for Green Productions of Alcohols-Ethers-Esters, College of Chemistry and Chemical Engineering, Xiamen University, Xiamen 361005, China

<sup>c</sup> Departamento de Química Orgánica, Universidad de Córdoba, Campus de Rabanales, Edificio Marie Curie (C-3), Ctra Nnal IV, Km 396, E14071, Córdoba, Spain

<sup>d</sup> Peoples Friendship University of Russia (RUDN University), 6 Miklukho Maklaya str., 117198, Moscow, Russia

Corresponding authors: lihuazhu@stu.xmu.edu.cn (L. Zhu); [q62alsor@uco.es](mailto:q62alsor@uco.es) (R. Luque)

<sup>1</sup> These authors contributed equally to this work.

## Supporting Information

***In-situ* FTIR:** Electrochemical *in-situ* Fourier transform infrared (FTIR) reflection spectroscopy was used by a Nicolet-8700 spectrometer included with a liquid-nitrogen-cooled MCT-A detector. The configurations and characteristics of IR cell was described in previous work. The absorbed species and dissolved species could be detected by IR passed through the thin solution layer formed by the working electrode and CaF<sub>2</sub> windows. A Pt foil and a SCE were used as counter and reference electrodes, respectively. The catalysts (2.0mg) were dispersed in 1.0 mL of mixed solution (ethanol: water = 1:1) and ultrasonicated 30 mins. The working electrode was deposited 10  $\mu$ L ink and added 5  $\mu$ L 0.25wt% Nafion solution after ink dried. The working electrode was electrochemically cleaned until stable in N<sub>2</sub>-saturated 1.0 M KOH solution, and electrochemical *in-situ* FTIR measured in 1.0 M KOH + 1.0 M ethanol solution. Multi-stepped FTIR spectroscopy (MS-FTIR) was used to collect spectra from -0.857 V to 0.143 V (vs.SCE) at 0.1 V intervals. The FTIR spectra were recorded from 1000 cm<sup>-1</sup> to 4000 cm<sup>-1</sup> with a spectral resolution of 8 cm<sup>-1</sup>. The spectra were reported as the relative change in reflectivity ( $\Delta R/R$ ), calculated by the following equation:

$$\frac{\Delta R}{R} = \frac{R(E_S) - R(E_R)}{R(E_R)}$$

(1)

$R(E_S)$  and  $R(E_R)$  represent the single-beam spectra recorded at the sample potential  $E_S$  and the reference potential  $E_R$ , respectively. The downward bands and upward bands in the resulting spectra indicate the formation of products and the consumption of reactants. The  $E_R$  was fixed at -0.757 V.

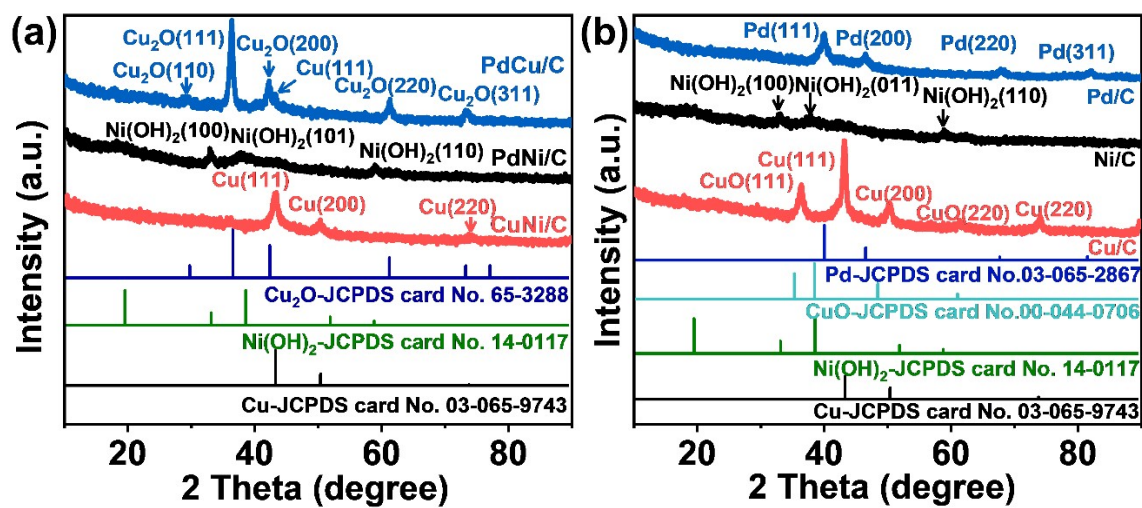

**Fig. S1.** XRD patterns of (a) PdNi/C, PdCu/C, CuNi/C and (b) Pd/C, Ni/C, Cu/C.

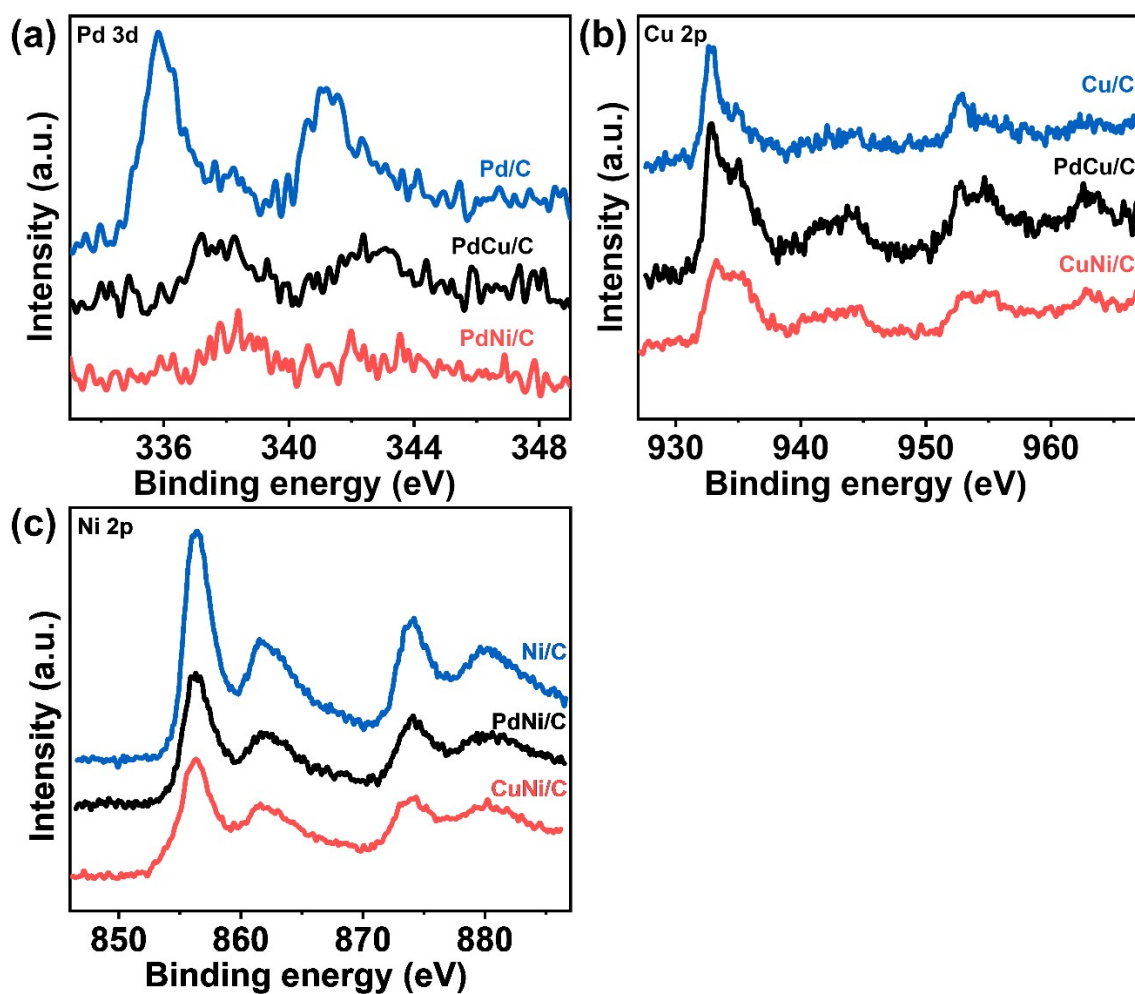

**Fig. S2.** (a) Pd 3d XPS spectra of PdNi/C, PdCu/C and Pd/C, (b) Cu 2p XPS spectra of PdCu/C, CuNi/C and Cu/C, (c) Ni 2p XPS spectra of PdNi/C, CuNi/C and Ni/C.

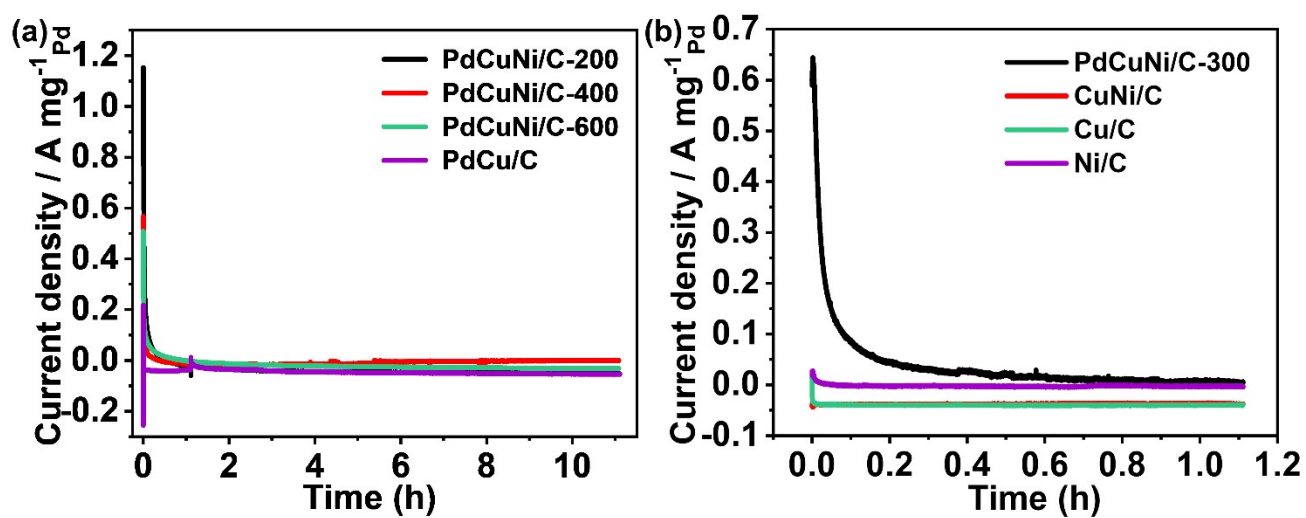

**Fig. S3.** (a) CA curves of electrocatalytic ethanol oxidation over PdCuNi/C-200, PdCuNi/C-400, PdCuNi/C-600 and PdCu/C catalysts at -0.3 V in 1.0 M KOH+1.0 M C<sub>2</sub>H<sub>5</sub>OH for lasting 11 h. (b) CA curves of electrocatalytic ethanol oxidation over PdCuNi/C-300, CuNi/C, Cu/C and Ni/C catalysts at -0.3 V in 1.0 M KOH+1.0 M C<sub>2</sub>H<sub>5</sub>OH for lasting 1h.

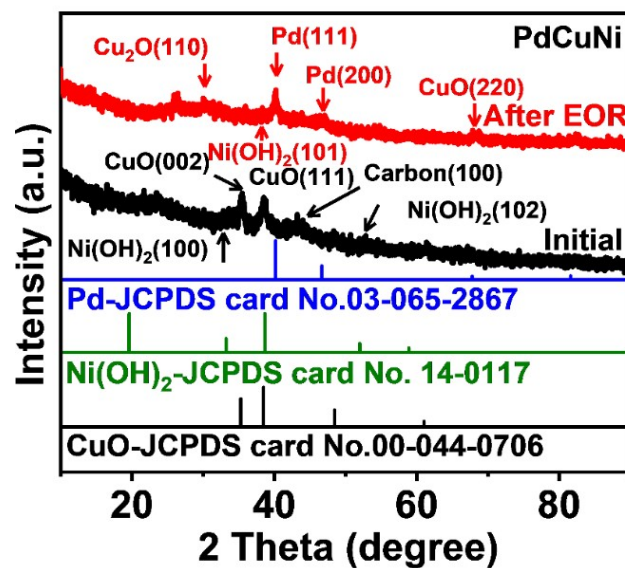

**Fig. S4.** The comparison of the XRD patterns of the PdCuNi/C catalyst before and after chronoamperograms.

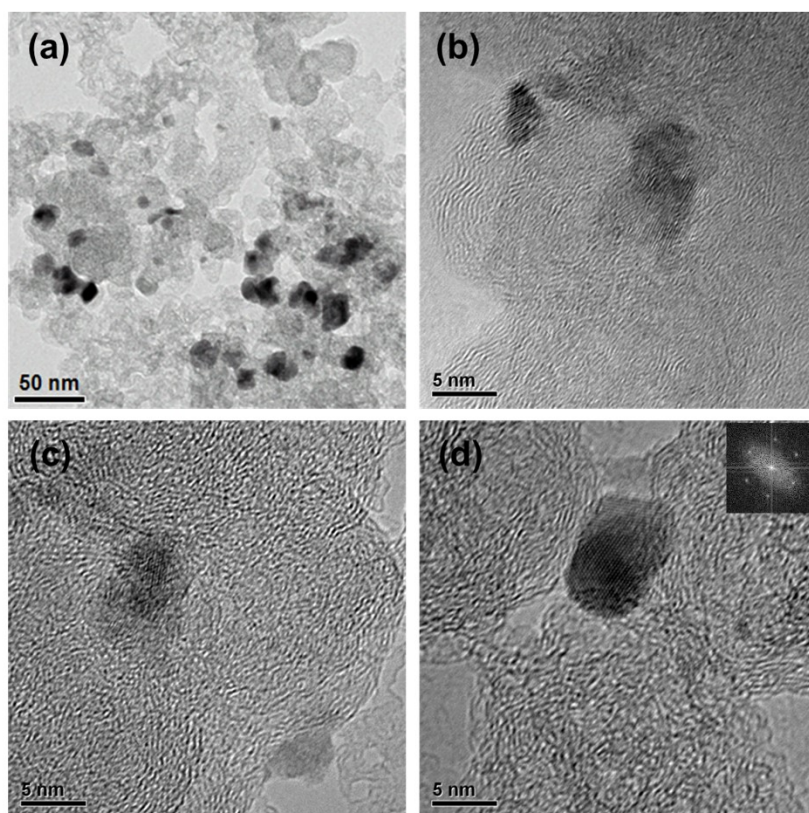

**Fig. S5.** (a-c) TEM images of PdCuNi/C with different magnifications and (d) HRTEM image of PdCuNi/C after Chronoamperograms, inset-patterns of FFT (fast Fourier transform).

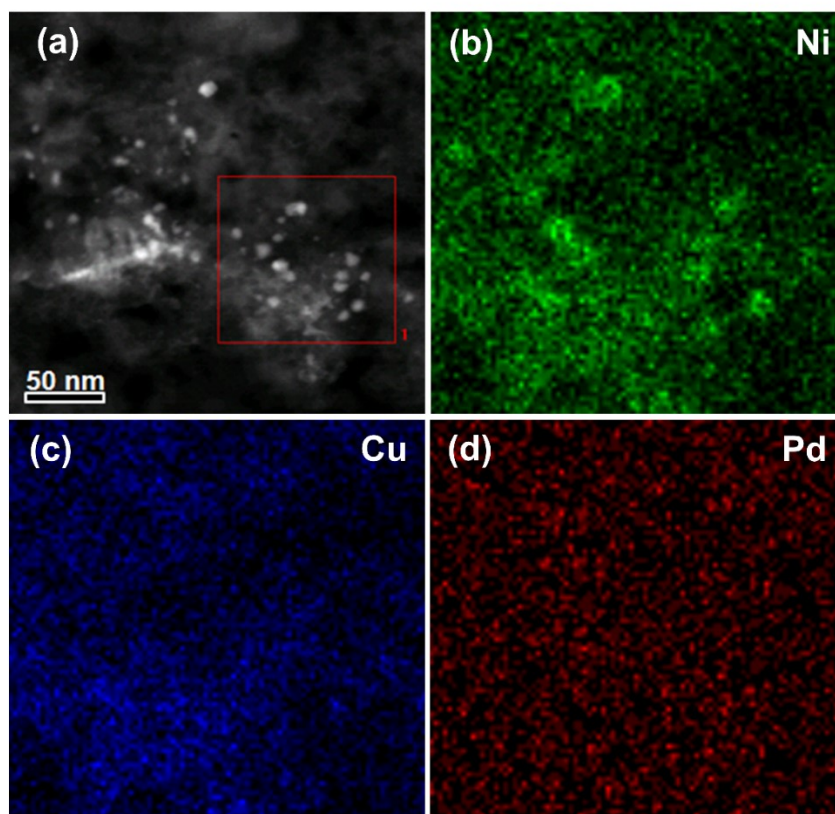

**Fig. S6.** (a) HAADF-STEM image of PdCuNi/C after Chronoamperograms, STEM-EDS elemental mapping of PdCuNi/C (b) Ni (green), (c) Cu (blue) and (d) Pd (red).

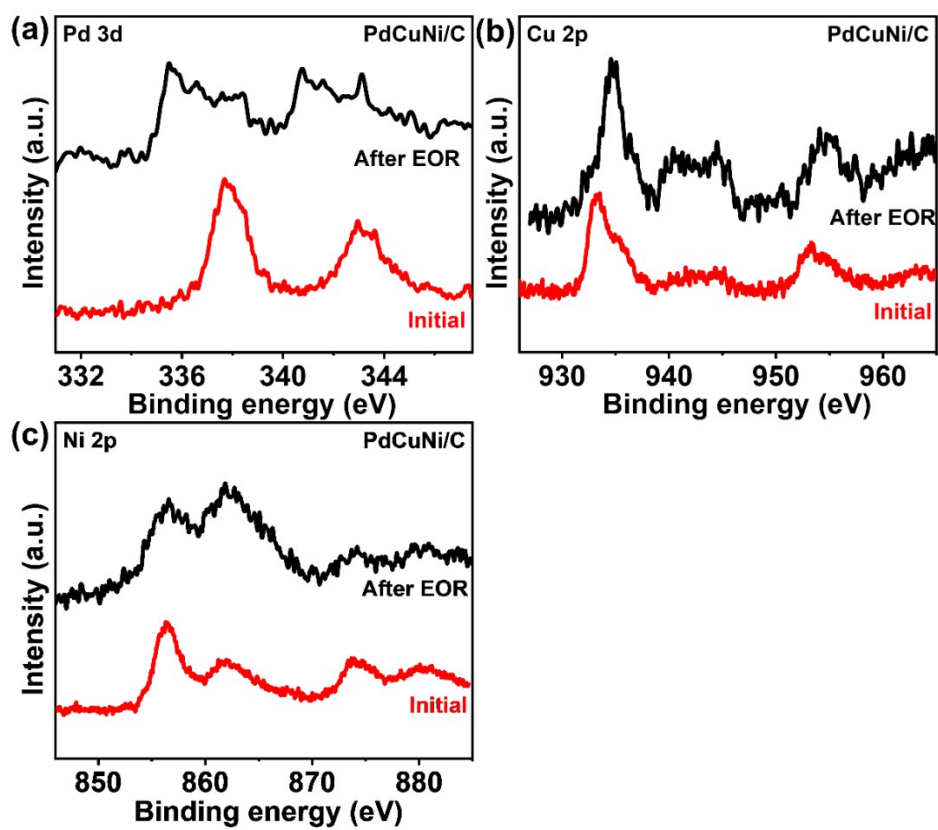

**Fig. S7.** (a) Pd 3d, (b) Cu 2p, (c) Ni 2p XPS spectra of PdCuNi/C before and after Chronoamperograms.

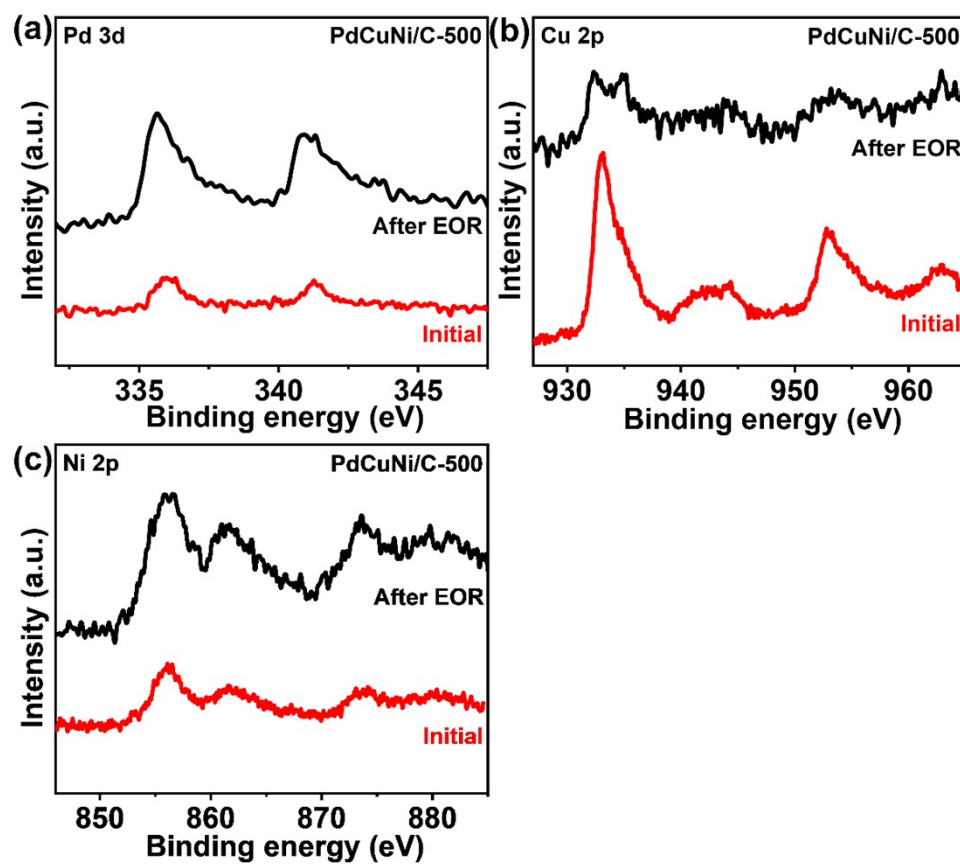

**Fig. S8.** (a) Pd 3d, (b) Cu 2p, (c) Ni 2p XPS spectra of PdCuNi/C-500 before and after Chronoamperograms.

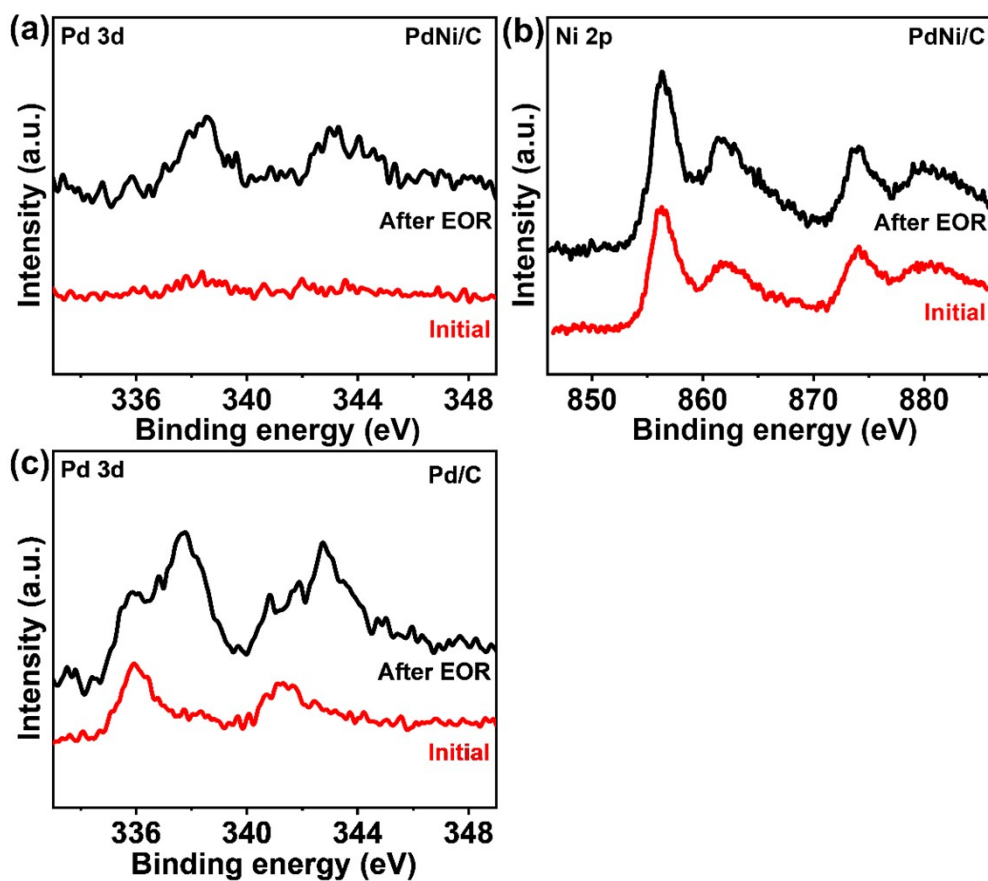

**Fig. S9.** (a) Pd 3d, (b) Ni 2p XPS spectra of PdNi/C before and after Chronoamperograms, (c) Pd 3d XPS spectrum of Pd/C before and after Chronoamperograms.

**Table S1.** Comparison of EOR activity between PdCuNi/C and other prepared catalysts before and after chronoamperometry.

| Electrocatalysts | E <sub>b</sub> | I <sub>b</sub>     | E <sub>a</sub> | I <sub>a</sub>     | Time |
|------------------|----------------|--------------------|----------------|--------------------|------|
|                  | V              | A/mg <sub>pd</sub> | V              | A/mg <sub>pd</sub> | h    |
| PdCuNi/C         | 0.84           | 3.72               | 0.80           | 3.08               | 22   |
| PdCuNi/C-200     | 0.80           | 2.84               | 0.84           | 2.88               | 11   |
| PdCuNi/C-300     | 0.90           | 2.28               | 0.89           | 0.84               | 1    |
| PdCuNi/C-400     | 0.78           | 1.09               | 0.79           | 0.88               | 11   |
| PdCuNi/C-500     | 0.86           | 1.23               | 0.80           | 0.89               | 22   |
| PdCuNi/C-600     | 0.78           | 1.46               | 0.78           | 1.40               | 11   |
| PdNi/C           | 0.81           | 0.14               | 0.78           | 0.08               | 22   |
| PdCu/C           | 0.86           | 0.09               | 0.82           | 0.84               | 11   |
| CuNi/C           | 0.85           | 0.13               | 0.80           | 0.08               | 1    |
| Ni/C             | 0.94           | 0.04               | 0.94           | 0.04               | 1    |
| Cu/C             | 0.86           | 0.13               | 0.87           | 0.07               | 1    |
| Pd/C             | 0.85           | 1.20               | 0.80           | 1.15               | 22   |

**Table S2.** Comparison of EOR activities between PdCuNi/C and other as-prepared catalysts.

| Electrocatalysts | $E_f$ | $I_f$              | $E_b$ | $I_b$              | $I_f/I_b$ |
|------------------|-------|--------------------|-------|--------------------|-----------|
|                  | V     | A/mg <sub>pd</sub> | V     | A/mg <sub>pd</sub> | -         |
| PdCuNi/C         | 0.84  | 3.72               | 0.73  | 5.59               | 0.67      |
| PdCuNi/C-200     | 0.80  | 2.84               | 0.71  | 5.26               | 0.54      |
| PdCuNi/C-300     | 0.90  | 2.28               | 0.75  | 2.60               | 0.88      |
| PdCuNi/C-400     | 0.78  | 1.09               | 0.69  | 2.46               | 0.23      |
| PdCuNi/C-500     | 0.86  | 1.23               | 0.74  | 1.80               | 0.68      |
| PdCuNi/C-600     | 0.78  | 1.46               | 0.68  | 3.01               | 0.48      |
| PdCu/C           | 0.81  | 0.14               | 0.68  | 0.25               | 0.56      |
| PdNi/C           | 0.86  | 0.08               | 0.68  | 0.08               | 1         |
| CuNi/C           | 0.85  | 0.13               | -     | -                  | -         |
| Cu/C             | 0.94  | 0.04               | -     | -                  | -         |
| Ni/C             | 0.86  | 0.13               | -     | -                  | -         |
| Pd/C             | 0.85  | 1.20               | 0.75  | 1.45               | 0.83      |
| Pd/C-JM          | 0.86  | 0.19               | 0.72  | 0.36               | 0.52      |

**Table S3.** Comparison of EOR activities between PdCuNi/C and reported electrocatalysts.

| Electrocatalysts                         | Electrolyte                                                                      | $E_r$<br>(V vs RHE) | Mass activity<br>(A $\text{mg}_{\text{metal}}^{-1}$ ) | References                                    |
|------------------------------------------|----------------------------------------------------------------------------------|---------------------|-------------------------------------------------------|-----------------------------------------------|
| PdCuNi/C                                 | 1 M KOH +<br>1 M C <sub>2</sub> H <sub>5</sub> OH                                | 0.84                | 3.72                                                  | This work                                     |
| PdCuNi/C-200                             | 1 M KOH +<br>1 M C <sub>2</sub> H <sub>5</sub> OH                                | 0.80                | 2.84                                                  | This work                                     |
| PdCuNi/C-300                             | 1 M KOH +<br>1 M C <sub>2</sub> H <sub>5</sub> OH                                | 0.90                | 2.28                                                  | This work                                     |
| 0.2SnO <sub>2</sub> -Rh NSs/C            | 0.1 M KOH +<br>0.5 M C <sub>2</sub> H <sub>5</sub> OH                            | 0.78                | 0.21                                                  | Adv. Mater. (2020) 2005767                    |
| 8nm Pd <sub>3</sub> Pb/C                 | 0.5 M KOH +<br>0.5 M C <sub>2</sub> H <sub>5</sub> OH                            | 0.83                | 2.50                                                  | Chem. Mater. 32 (2020)<br>2044–2052           |
| AlPdNiCuMo                               | 0.1 M KOH +<br>0.5 M C <sub>2</sub> H <sub>5</sub> OH                            | 0.87                | 2.67                                                  | Adv. Funct. Mater. (2020)<br>2007129          |
| 100-Ni(OH) <sub>2</sub> @Pd/GD           | 1 M KOH +<br>1 M C <sub>2</sub> H <sub>5</sub> OH                                | 0.73                | 1.44                                                  | Appl. Surf. Sci. 420 (2017)<br>214–221        |
| Au@Pt <sub>1</sub> -Pd <sub>1</sub> H-Ss | 1 M KOH +<br>1 M C <sub>2</sub> H <sub>5</sub> OH                                | 0.95                | 3.17                                                  | Adv. Mater. (2021) 2100713                    |
| Pt/MoS <sub>2</sub> /GNS                 | 0.1 M H <sub>2</sub> SO <sub>4</sub> +<br>0.1 M C <sub>2</sub> H <sub>5</sub> OH | 1.61                | 0.85                                                  | Appl. Catal. B: Environ, 259<br>(2019) 118060 |
| PtSn-350°C                               | 0.5 M H <sub>2</sub> SO <sub>4</sub> +<br>1 M C <sub>2</sub> H <sub>5</sub> OH   | 1.74                | 0.36                                                  | Nano Energy 70 (2020)<br>104565               |

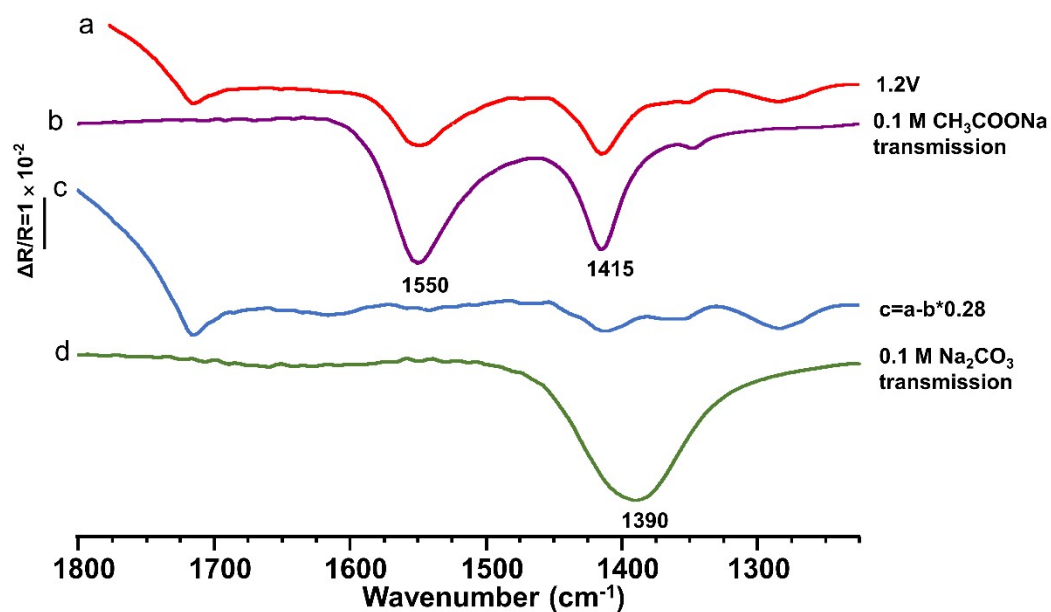

**Fig. S10.** (a) Identification of carbonate as the product of ethanol electrocatalytic oxidation. *In-situ* FTIR spectrum of the electrooxidation of 0.1 M ethanol at 1.20 V. Transmission IR spectra of (b) 0.1 M  $\text{CH}_3\text{COONa}$  and (d) 0.1 M  $\text{Na}_2\text{CO}_3$ . (c) The resulting spectrum of  $a - b \cdot 0.28$ . The band at  $1415\text{ cm}^{-1}$  and  $1550\text{ cm}^{-1}$  can be assigned to  $\text{CH}_3\text{COO}^-$  as compared with spectrum b. And the band at  $1390\text{ cm}^{-1}$  can be assigned to  $\text{CO}_3^{2-}$  as compared with spectrum d.
